# Supplementary material for: Modeling Higher-Order Correlations within Cortical Microcolumns
Source: PubMed Central journal article supplement (PMC4081002; doi:10.1371/journal.pcbi.1003684), 2014-07-03

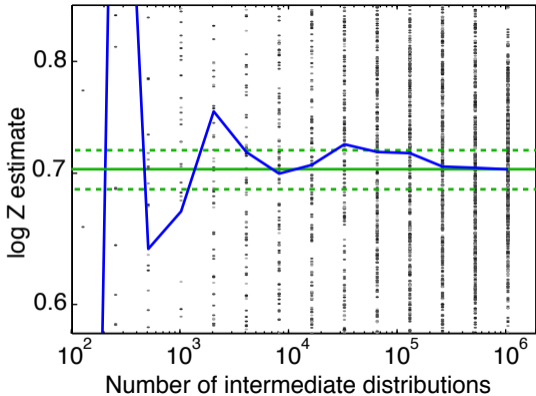

Supplement: pcbi.1003684.s001.pdf [file pcbi.1003684.s001.pdf]
