# Supplementary material for: Modeling Higher-Order Correlations within Cortical Microcolumns
Source: PubMed Central journal article supplement (PMC4081002; doi:10.1371/journal.pcbi.1003684), 2014-07-03

a) Waveforms for all units

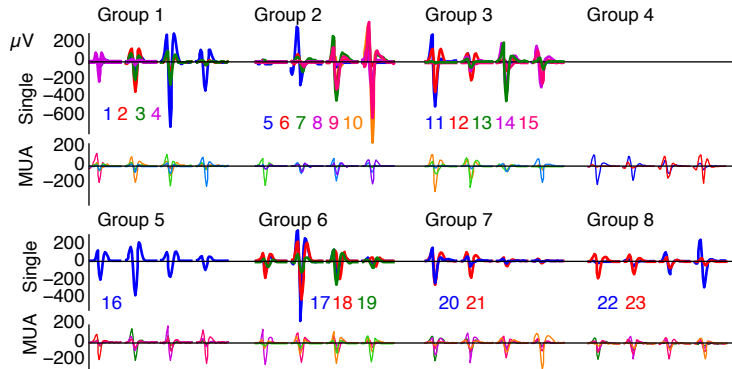

b) Cluster separation (group 2 single units)

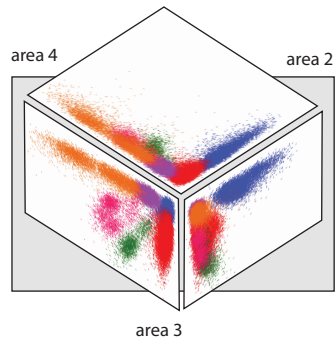

c) ISI histograms for all 23 single units

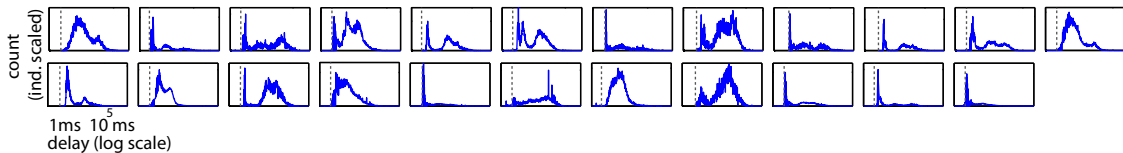

Supplement: pcbi.1003684.s002.pdf [file pcbi.1003684.s002.pdf]
