# Supplementary material for: Modeling Higher-Order Correlations within Cortical Microcolumns
Source: PLOS journal article supplement (doi:10.1371/journal.pcbi.1003684), 2014-07-03
Supplement: S5 (10.1371/journal.pcbi.1003684.s005) [file journal.pcbi.1003684.s005]

301 Moved Permanently

# Moved Permanently

The document has moved here.

---

Apache Server at www.ploscompbiol.org Port 80
